# Supplementary figures and images for: Synthesis of magnetic mesoporous titania colloidal crystals through evaporation induced self-assembly in emulsion as effective and recyclable photocatalysts
Source: Royal Society of Chemistry journal article supplement (doi:10.1039/c5cp05005g), 2015-01-01

**Figure S1**

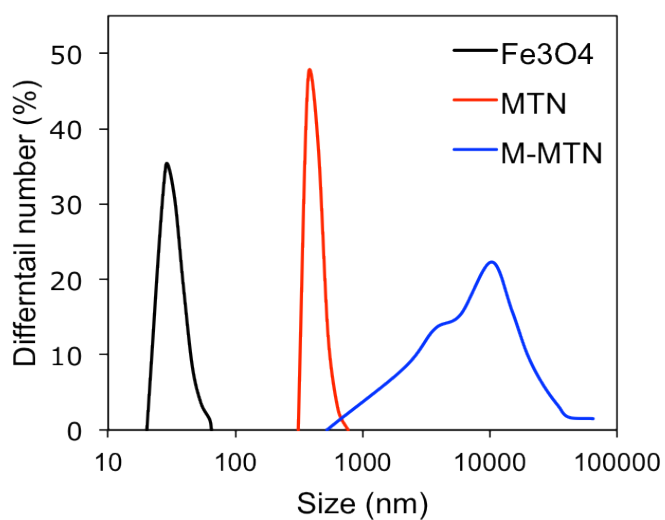

**Figure S1.** Particle size distribution of Fe<sub>3</sub>O<sub>4</sub>, MTN, and M-MTN.

Supplement: c5cp05005g1.pdf [file c5cp05005g1.pdf]
